# Supplementary material for: A Novel Xeno-Free Method to Isolate Human Endometrial Mesenchymal Stromal Cells (E-MSCs) in Good Manufacturing Practice (GMP) Conditions
Source: MDPI journal article supplement (doi:10.3390/ijms23041931), 2022-02-09
Supplement: s1 [file s1]

**Table S1.** Clinical characteristics of patients enrolled for the study.

| Curette |     |      |                  |                     |                   |
|---------|-----|------|------------------|---------------------|-------------------|
| Sample  | Age | BMI  | Gravidity/Parity | Indication          | Other Pathologies |
| E-MSC01 | 22  | 23.6 | 0/0              | Benign ovarian cyst | none              |
| E-MSC05 | 19  | 22.3 | 1/0              | Benign ovarian cyst | none              |
| E-MSC09 | 33  | 21.8 | 1/1              | Benign ovarian cyst | none              |
| VABRA   |     |      |                  |                     |                   |
| Sample  | Age | BMI  | Gravidity/Parity | Indication          | Other Pathologies |
| E-MSC02 | 35  | 24.7 | 1/1              | Endometrial polyp   | none              |
| E-MSC04 | 33  | 20.4 | 0/0              | Endometrial polyp   | none              |
| E-MSC07 | 35  | 21.5 | 1/1              | Endometrial polyp   | none              |
